# Supplementary material for: Pathogen detection in RNA-seq data with Pathonoia
Source: PubMed Central journal article supplement (PMC9938591; doi:10.1186/s12859-023-05144-z), 2023-02-17
Supplement: 12859_2023_5144_MOESM1_ESM.pdf [file 12859_2023_5144_MOESM1_ESM.pdf]

## SUPPLEMENTARY MATERIAL

# Supporting Information - Pathonoia

## S1 Pathonoia Algorithm Details

Pathonoia was developed for analyzing the adhering metagenome of an RNA-seq sample or dataset. The algorithm takes FASTA files as input, which are, in the first step, evaluated by the Kraken 2 [1] algorithm. Kraken 2 accepts also fastQ files and single-end, as well as paired-end read files. Pathonoia's code can be easily adjusted to accept those file types as well.

For obtaining the unaligned reads from a host-aligned sample, SAMtools [2] can be used on the BAM file produced by most aligners as follows:

```
samtools aligned.bam view -hb -f 4 > hostUnmapped.bam
samtools view hostUnmapped.bam — awk 'OFS="\t"; print ">" $1 "\n" $10' - > hostUnmapped.fa
```

In case STAR [3] is used for alignment to the host genome, the parameter `--outReadsUnmapped Fastx` can be used for obtaining the unmapped reads.

The Kraken 2 index used for Pathonoia and the results in the main manuscript was built in March 2019 using the following commands:

```
./kraken2-build --download-taxonomy --db db/bacvir_k31
./kraken2-build --download-library bacteria --db db/bacvir_k31 --use-ftp
./kraken2-build --download-library viral --db db/bacvir_k31 --use-ftp
./kraken2-build --build --db db/bacvir_k31 --threads 8 --kmer-len 31 --minimizer-len 31
./kraken2-build --clean --db db/bacvir_k31
```

An updated index from May 2022, created with the same commands, is available for download, on [https://oasis.ims.bio/kraken2\\_k31\\_2205.zip](https://oasis.ims.bio/kraken2_k31_2205.zip).

We set the k-mer length equal to the maximal minimizer length in Kraken 2  $k = l = 31$ . This forces Kraken 2 to use no optimization (in terms of memory usage) at the cost of precision. You may refer to the original Kraken 2 publication [1] for details. Since the relatively short  $k = 31$  (default is  $k = 35$ ) allows for too many random (incorrect) matches to the index, Pathonoia only considers sequences, where at least  $z > 4$  k-mers in a row were classified identically (not mentioned in figure). We use  $z > 4$  for matching the original k-mer default length of  $k = 35$ , where our index was built with  $k = 31$ .

The runtime of Pathonoia is majorly based on Kraken 2, as it takes the majority of runtime and memory of the algorithm. Pathonoia can be considered an “add-on” to Kraken 2 and scans the results in one pass. For example, a dataset of 125 samples ( $\sim 50$ GB of fastq.gz files) took 50 min processing time (for the add-on part alone, parallel processing turned off), including the merge of the results, after having run Kraken 2 for all samples within several hours on the same server. Kraken 2's runtime has been benchmarked previously by Ye *et al.*, [5] and is in our experience greatly dependent on the available RAM to load the index, while the actual runtime with 32 threads is around 10 seconds for each sample.

### S1.1 Exceptions of discovered species, not discovered by Kraken

Kraken 2 classifies each read with the Lowest Common Ancestor (LCA) of the species corresponding to all k-mers of this read. Pathonoia is based on the same species - k-mer alignments but abstracts from their read

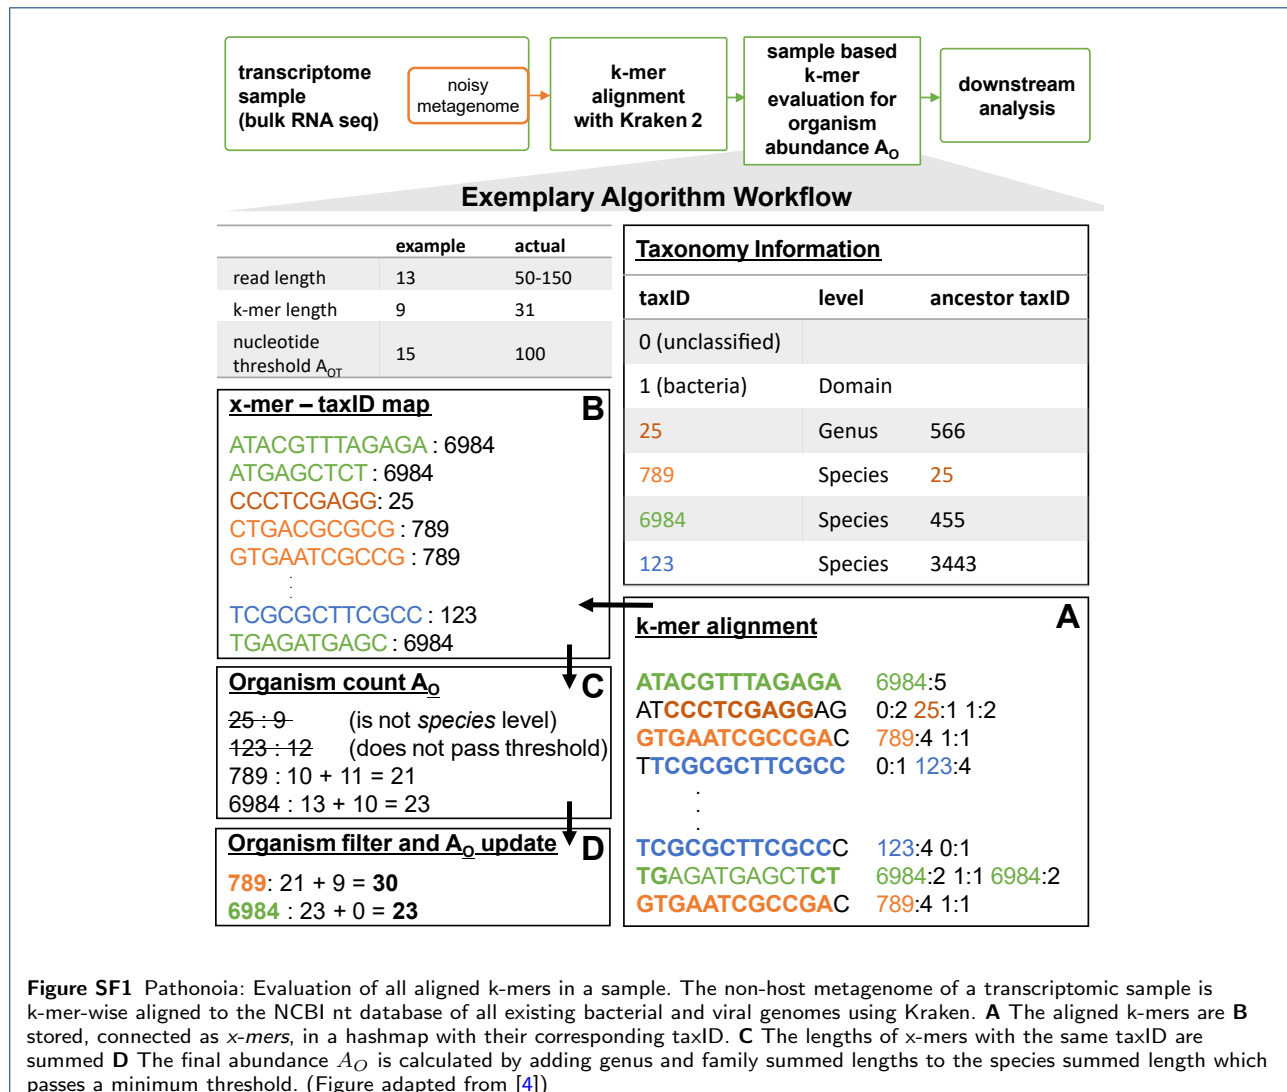

“environment”. It counts the k-mers of the same species for all k-mers (in all reads) of the same sample. Therefore, it can theoretically be, that some species will not be reported by Kraken 2 that is discovered by Pathonoia. In that case the LCA classification algorithm of Kraken 2 is masking it.

### S1.2 Recall, Precision and F1 Score for Benchmarked Algorithms

The following tables contain the underlying data for our benchmark and Figures 2D-E. They are recall, precision and F1 score for the seven simulated samples and their average per evaluated algorithm.

**Table ST1** Recall and Precision for simulated dataset comparing Pathonoia with Kraken 2-based algorithms and Centrifuge.

| RECALL    | Kraken2 | K2 ≥ 5reads | Bracken | KrakenUniq | Centrifuge | Pathonoia | PRECISION | Kraken2 | K2 ≥ 5reads | Bracken | KrakenUniq | Centrifuge | Pathonoia |
|-----------|---------|-------------|---------|------------|------------|-----------|-----------|---------|-------------|---------|------------|------------|-----------|
| buccal    | 0.750   | 0.125       | 0.500   | 0.583      | 0.750      | 0.708     | buccal    | 0.044   | 0.032       | 0.090   | 0.090      | 0.016      | 0.168     |
| cityparks | 0.929   | 0.082       | 0.480   | 0.510      | 0.929      | 0.673     | cityparks | 0.049   | 0.027       | 0.137   | 0.095      | 0.029      | 0.274     |
| gut       | 0.756   | 0.089       | 0.444   | 0.467      | 0.756      | 0.689     | gut       | 0.029   | 0.025       | 0.185   | 0.057      | 0.016      | 0.205     |
| hous1     | 0.785   | 0.092       | 0.446   | 0.462      | 0.785      | 0.662     | hous1     | 0.056   | 0.038       | 0.176   | 0.111      | 0.027      | 0.285     |
| hous2     | 0.865   | 0.189       | 0.541   | 0.541      | 0.865      | 0.676     | hous2     | 0.033   | 0.026       | 0.101   | 0.066      | 0.013      | 0.275     |
| nycsm     | 0.739   | 0.065       | 0.413   | 0.413      | 0.761      | 0.609     | nycsm     | 0.067   | 0.027       | 0.157   | 0.117      | 0.037      | 0.226     |
| soil      | 0.931   | 0.020       | 0.490   | 0.510      | 0.931      | 0.676     | soil      | 0.036   | 0.003       | 0.062   | 0.063      | 0.022      | 0.198     |
| mean      | 0.822   | 0.095       | 0.473   | 0.498      | 0.825      | 0.670     | mean      | 0.045   | 0.025       | 0.130   | 0.086      | 0.023      | 0.233     |

**Table ST2** F1 Score for simulated samples comparing Pathonia with Kraken 2-based algorithms and Centrifuge (left). Number of detected species in each sample (right).

| F1        | Kraken2 | K2 ≥ 5reads | Bracken | KrakenUniq | Centrifuge | Pathonia | DETECTED  | Kraken2 | K2 ≥ 5reads | Bracken | KrakenUniq | Centrifuge | Pathonia |
|-----------|---------|-------------|---------|------------|------------|----------|-----------|---------|-------------|---------|------------|------------|----------|
| buccal    | 0.084   | 0.051       | 0.152   | 0.156      | 0.031      | 0.272    | buccal    | 407     | 94          | 134     | 155        | 1146       | 101      |
| cityparks | 0.093   | 0.040       | 0.214   | 0.160      | 0.056      | 0.389    | cityparks | 1850    | 298         | 342     | 527        | 3152       | 241      |
| gut       | 0.056   | 0.039       | 0.261   | 0.102      | 0.032      | 0.316    | gut       | 1163    | 158         | 108     | 366        | 2104       | 151      |
| hous1     | 0.105   | 0.053       | 0.252   | 0.179      | 0.053      | 0.398    | hous1     | 907     | 160         | 165     | 270        | 1868       | 151      |
| hous2     | 0.063   | 0.045       | 0.169   | 0.117      | 0.026      | 0.391    | hous2     | 976     | 274         | 199     | 305        | 2410       | 91       |
| nycsm     | 0.123   | 0.038       | 0.228   | 0.183      | 0.070      | 0.329    | nycsm     | 509     | 113         | 121     | 162        | 954        | 124      |
| soil      | 0.068   | 0.006       | 0.110   | 0.113      | 0.043      | 0.306    | soil      | 2674    | 585         | 810     | 821        | 4359       | 349      |
| mean      | 0.085   | 0.039       | 0.198   | 0.144      | 0.044      | 0.343    | mean      | 1212    | 240         | 268     | 372        | 2285       | 173      |

S1.3 Pathonia’s internal threshold  $A_{OT}$

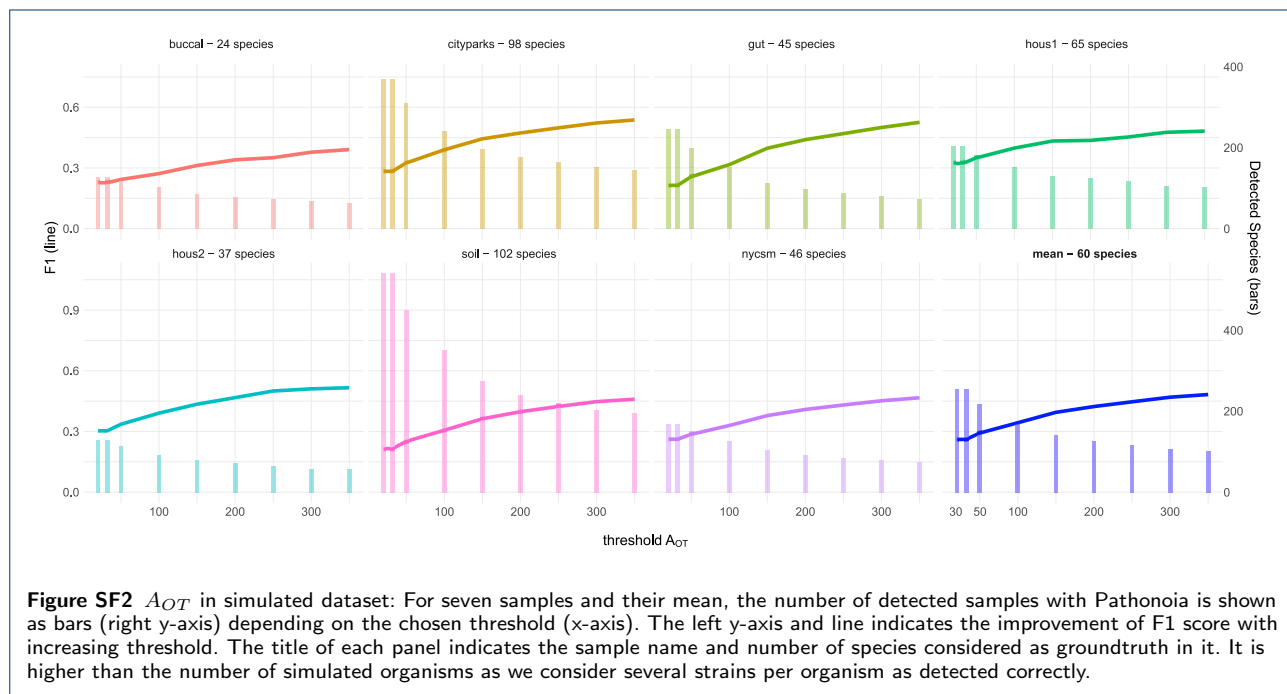

**Figure SF2**  $A_{OT}$  in simulated dataset: For seven samples and their mean, the number of detected samples with Pathonia is shown as bars (right y-axis) depending on the chosen threshold (x-axis). The left y-axis and line indicates the improvement of F1 score with increasing threshold. The title of each panel indicates the sample name and number of species considered as groundtruth in it. It is higher than the number of simulated organisms as we consider several strains per organism as detected correctly.

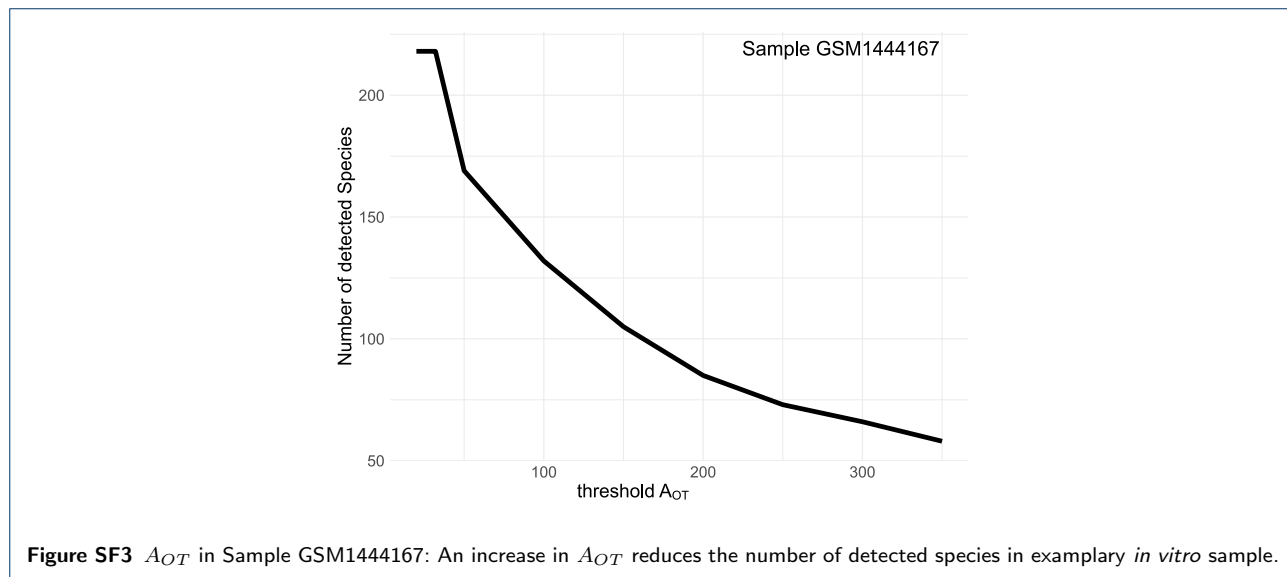

**Figure SF3**  $A_{OT}$  in Sample GSM1444167: An increase in  $A_{OT}$  reduces the number of detected species in exemplary *in vitro* sample.

## S2 Downstream Analysis

### S2.1 Settings for associated tools

For the analysis of our example datasets, we used the STAR aligner [3] for retrieving aligned (and unaligned) reads using the following settings:

```
./STAR-2.5.3a/source/STAR --genomeDir ./indecies/STAR.Human/ --runThreadN 8 --alignIntronMax 0
--outFilterMismatchNoverLmax 0.06 --outSAMtype BAM SortedByCoordinate
--outStd BAM_SortedByCoordinate --outSAMunmapped Within --readFilesIn s1.fasta s2.fasta
--outFileNamePrefix outdir/sampleName_STAR_ > outdir/sampleName_staralign.bam
```

In the final step of the downstream analysis, we use WebGestalt for the functional enrichment analysis of the (human) gene sets. We use the R version of the tool for the analysis of biological processes and molecular functions, with the following settings:

```
WebGes_BioProc <- function(genes, projectname)
  WebGestaltR(enrichMethod="ORA", organism="hsapiens", enrichDatabase="geneontology_Biological_Process",
  interestGene=genes,interestGeneType="ensembl_gene_id", referenceGeneType="genesymbol",
  referenceSet="genome_protein-coding", minNum=5, maxNum=2000, fdrMethod="BH", sigMethod="fdr", fdrThr=0.05,
  topThr=10, reportNum=20, perNum=1000, nThreads=64, isOutput=TRUE,
  outputDirectory="GO_results/GO_Analysis_biolProcess_FDR05", projectName=projectname, dagColor="continuous",
  hostName="http://www.webgestalt.org/")
```

```
WebGes_MolFun <- function(genes, projectname)
  WebGestaltR(enrichMethod="ORA", organism="hsapiens", enrichDatabase="geneontology_Molecular_Function",
  interestGene=genes,interestGeneType="ensembl_gene_id", referenceGeneType="genesymbol",
  referenceSet="genome_protein-coding", minNum=5, maxNum=2000, fdrMethod="BH",sigMethod="fdr",
  fdrThr=0.05,topThr=10, reportNum=20, perNum=1000, nThreads=64, isOutput=TRUE,
  outputDirectory="GO_results/GO_Analysis_molFunction_FDR05", projectName=projectname,
  dagColor="continuous",hostName="http://www.webgestalt.org/")
```

### S2.2 Properties of $A_O$

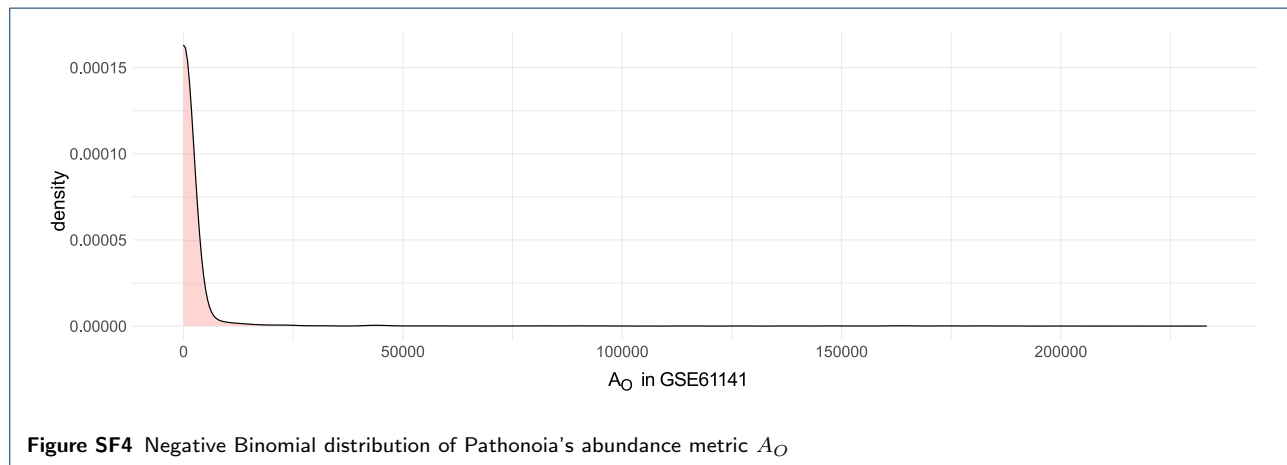

Figure SF4 Negative Binomial distribution of Pathonoia's abundance metric  $A_O$

### S3 Supplementary Information for FTD study

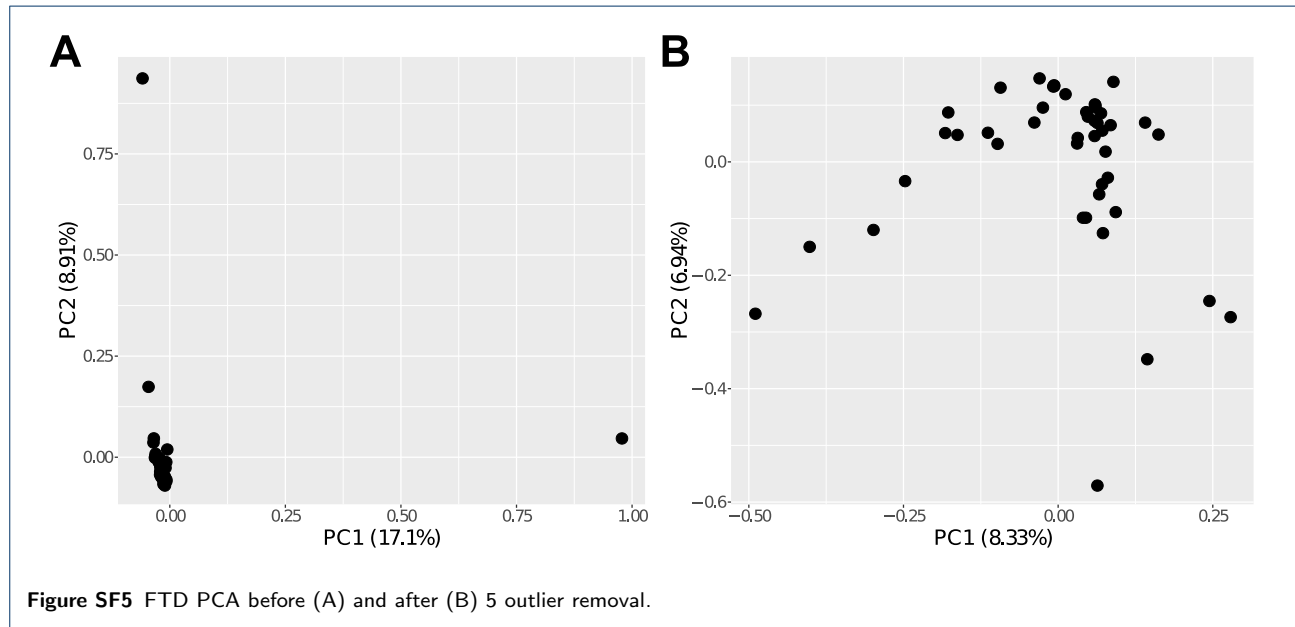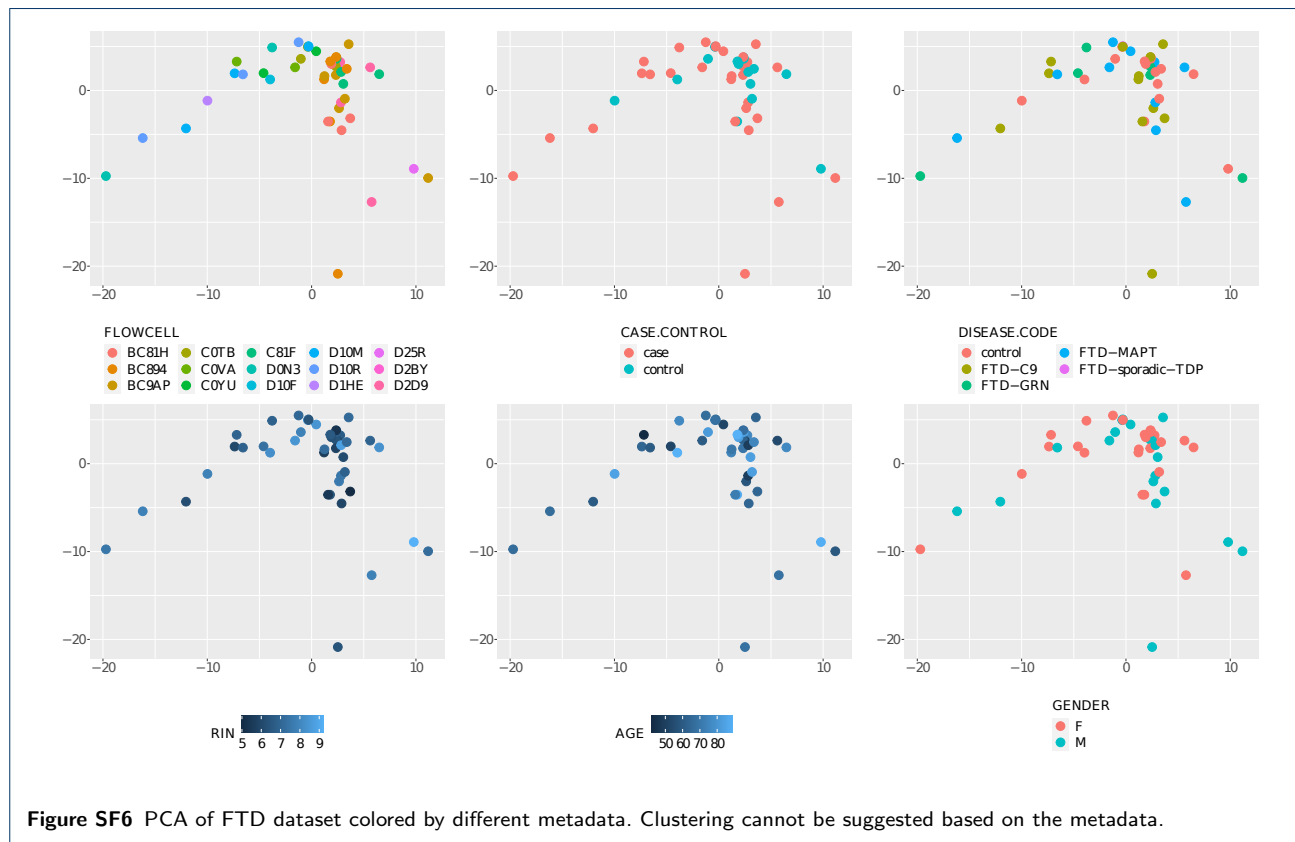

**Table ST3** All significantly differentially expressed pathogens in brain tissue of FTD patients vs. control

| species name                       | TaxID   | base mean | log2FC | padj-value |
|------------------------------------|---------|-----------|--------|------------|
| <i>Flavobacterium indicum</i>      | 1094466 | 957.01    | -28.88 | 1.7E-18    |
| <b>Burkholderia stabilis</b>       | 95485   | 220.14    | -26.85 | 2.5E-18    |
| <i>Caulobacter sp. FWC26</i>       | 69665   | 454.84    | -27.85 | 1.2E-17    |
| <i>Paracoccus yeei</i>             | 147645  | 152.09    | 27.49  | 1.5E-17    |
| <i>Sphingomonas sp. PAMC26645</i>  | 2565555 | 131.38    | -25.72 | 2.7E-15    |
| <i>Burkholderia multivorans</i>    | 87883   | 181.25    | -25.69 | 2.7E-15    |
| <i>Lactobacillus curvatus</i>      | 28038   | 49.67     | -24.75 | 2.9E-14    |
| <i>Neisseriaceae bacterium</i>     | 2052837 | 27.47     | -24.02 | 1.6E-13    |
| <i>Staphylococcus hominis</i>      | 1290    | 25.26     | -23.90 | 1.9E-13    |
| <i>Arachidococcus sp. KIS59-12</i> | 2341117 | 8.06      | 23.61  | 2.4E-13    |
| <i>Acidovorax sp. 1608163</i>      | 2478662 | 17.45     | -23.40 | 5.3E-13    |
| <i>Rheinheimera sp. LHK132</i>     | 2498451 | 17.20     | -23.38 | 5.3E-13    |

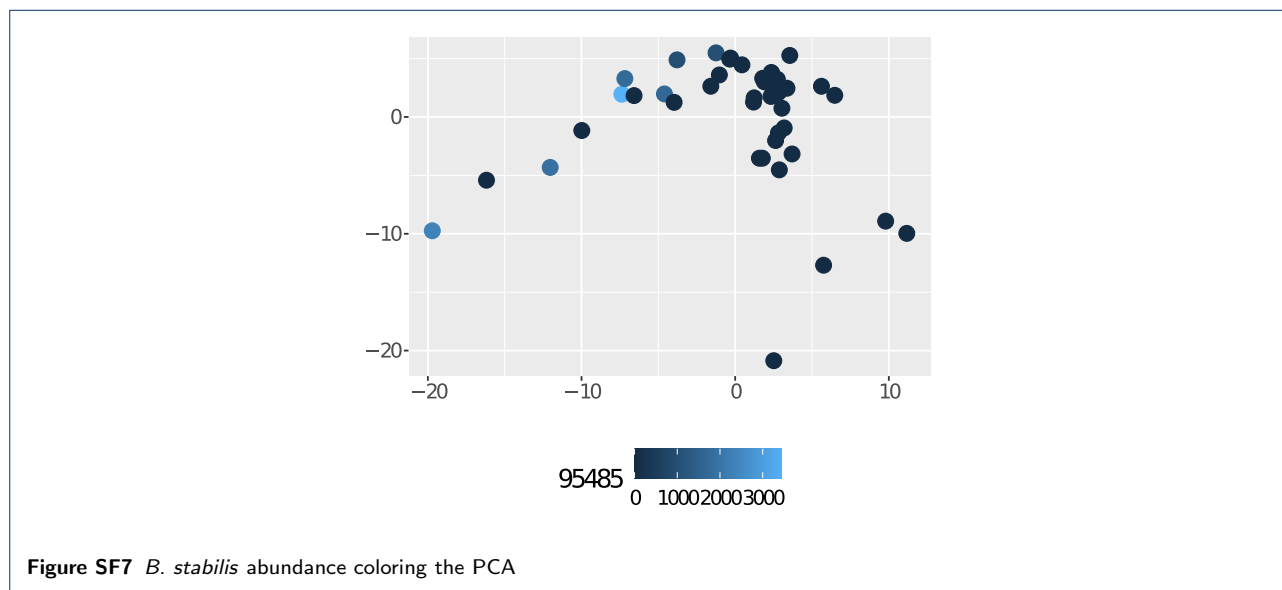

**Figure SF7** *B. stabilis* abundance coloring the PCA

**Table ST4** Using [SEAweb](#) with the search terms "brain" and "*Burkholderia Pseudomallei*" (closest to *B.Stabilis* as the latter was not found in SEA datasets), we find significant differential abundance of *B. Pseudomallei* in two independent datasets concerning neurological diseases comparing patient samples and control.

| Entity                 | Dataset  | Condition | Group A            | Group B              | Covariates | log2 FC | p-adj. value |
|------------------------|----------|-----------|--------------------|----------------------|------------|---------|--------------|
| <i>B. pseudomallei</i> | GSE46131 | disease   | Lewy body dementia | non-demented         | age-gender | -2.29   | 0.0048       |
| <i>B. pseudomallei</i> | GSE64977 | disease   | healthy            | Huntington's disease | age-gender | 1.68    | 0.0326       |

**Table ST5** List of significantly ( $p\text{-adj. value} < 0.05$ ) up- and down-regulated genes in FTD patient samples with vs. without *B.stabilis* infection.

| Upregulated Genes |            | Downregulated Genes |         |            |            |            |            |
|-------------------|------------|---------------------|---------|------------|------------|------------|------------|
| MIR570            | CFAP47     | AC012184.2          | SYNPO   | ZNF582-AS1 | BRSK1      | LSM10      | TBC1D25    |
| CFAP45            | AL645608.1 | ACRV1               | ELAVL3  | SEC16B     | TCP11L1    | STX1B      | DHX30      |
| AC018688.1        | AL596247.1 | SNORA50B            | FAIM2   | RUNDC1     | KCNA2      | POGLUT1    | TTC7B      |
| OTOG              | GALNT4     | AC004706.4          | CDHR2   | GNB1       | PLEKHM3    | CD101      | VAMP2      |
| AQP4-AS1          | RN7SL525P  | MRGPRE              | ACHE    | LINC02192  | CAMK1D     | MLST8      | RHOBTB2    |
| HAUS4             | LINC01094  | ERAL1               | NEFH    | CLPTM1     | BTBD6      | HK1        | DMRTC1B    |
| GBP3              | CDC20B     | EPB41L1             | ERICH1  | VWA7       | PCLO       | AC068580.4 | PUM2       |
| IL17RE            | AC104058.1 | SYN1                | AES     | AL009176.1 | KAZN       | UBL7       | SLC29A1    |
| AL445483.1        | KIAA0391   | PRDM8               | RNF157  | CISD3      | NOC2LP1    | NUDC       | SEC16A     |
| RNU2-2P           | P2RX4      | HAPLN4              | TCEA2   | AAK1       | AL355075.4 | ZNF365     | SRP68      |
| AL513314.2        | SEC1P      | AC010970.1          | NCKIPSD | ZNF653     | AC244517.1 | SLC25A44   | ASPDH      |
| RF00017           | CBR3-AS1   | PMS2P6              | KCNS1   | AC090587.2 | FP671120.3 | ZNF668     | CCNT2-AS1  |
| RGR               | PCAT5      | CACNG8              | CUX2    | PSMC5      | MAEA       | CYP1B1-AS1 | AL450992.2 |
| SNORA53           | RNF19A     | PI4K2A              | TMEM39B | SLC9A1     | UBE2E2     | PHACTR1    | OPTN       |
| MIR548H3          | IL1RL1     | SSU72               | LRFN3   | CORO2B     | BAAT       | AKNAD1     | SIRPA      |
| RN7SL32P          | IL18R1     | GSK3A               | NEFM    | SKIL       | LARP1      | PRRC2B     |            |
| CD24              | DOCK7      | ATP1A1              | SCAMP5  | SALRNA1    | KCNN1      | NOMO1      |            |
| PRDM2             | HNRNPUL2   | KCNC3               | DYNLL2  | LZTS3      | GNG13      | HAS1       |            |

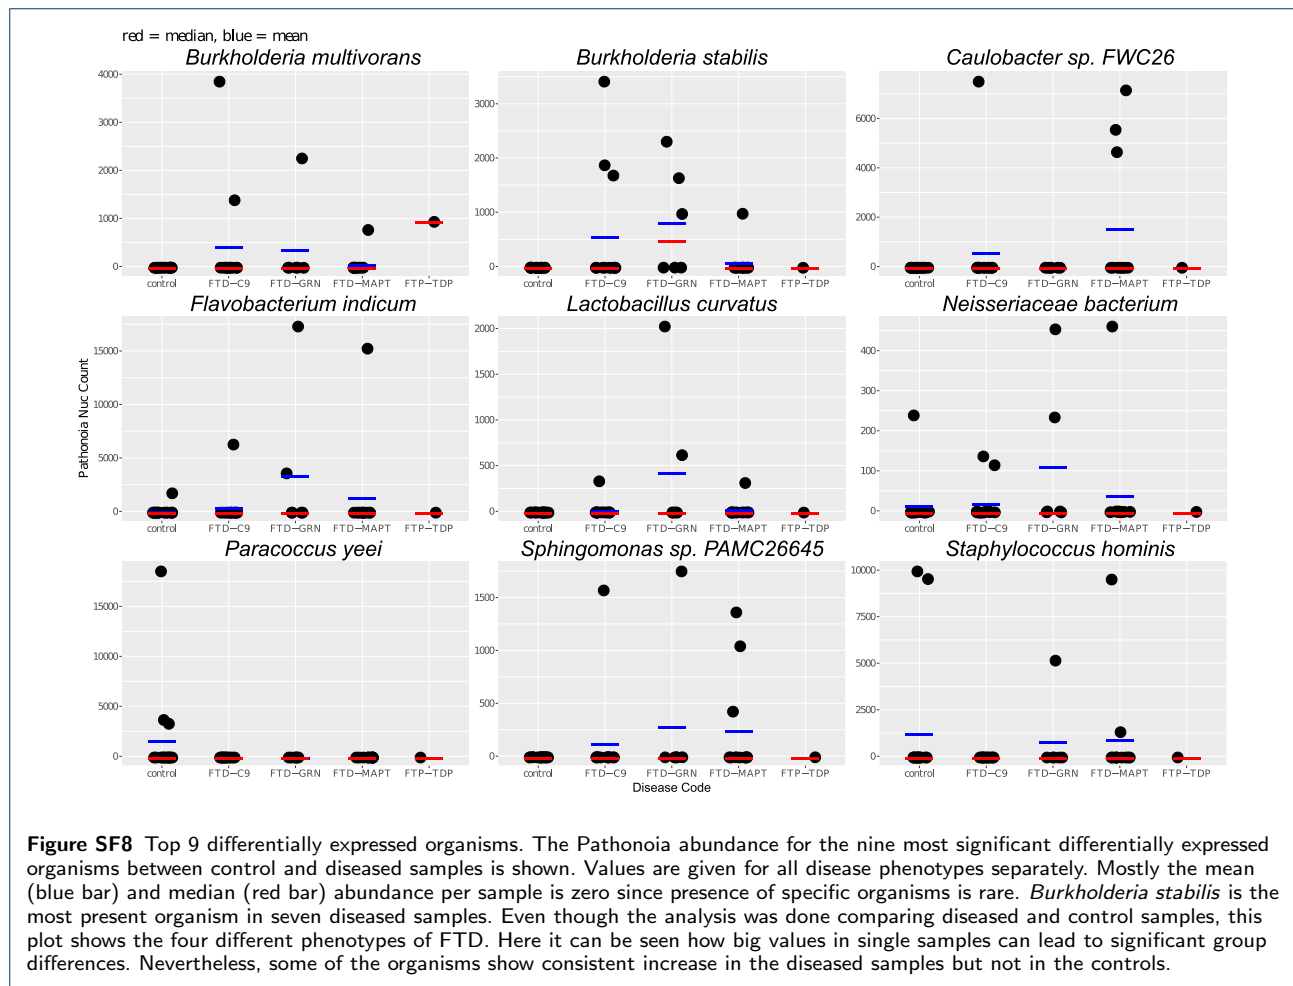

**Table ST6** The top ten biological processes enriched by the set of 34 up-regulated genes in patients with *B.stabilis* present vs patients without this pathogen. The high FDR value for multiple test correction is less informative in this case, as the number of considered genes is low. FDR = 1 for all.

| geneSet    | description                                             | size | overlap | expect   | enrichm.Ratio | pValue   |
|------------|---------------------------------------------------------|------|---------|----------|---------------|----------|
| GO:0002825 | regulation of T-helper 1 type immune response           | 27   | 2       | 0.021063 | 94.95157      | 1.95E-04 |
| GO:0042088 | T-helper 1 type immune response                         | 42   | 2       | 0.032765 | 61.04029      | 4.75E-04 |
| GO:0120163 | negative regulation of cold-induced thermogenesis       | 47   | 2       | 0.036666 | 54.54664      | 5.95E-04 |
| GO:0071345 | cellular response to cytokine stimulus                  | 1015 | 5       | 0.791827 | 6.314513      | 7.08E-04 |
| GO:0034097 | response to cytokine                                    | 1100 | 5       | 0.858137 | 5.826573      | 0.001022 |
| GO:0051241 | negative regulation of multicellular organismal process | 1143 | 5       | 0.891683 | 5.607376      | 0.001216 |
| GO:0019221 | cytokine-mediated signaling pathway                     | 705  | 4       | 0.549988 | 7.272886      | 0.001672 |
| GO:0032649 | regulation of interferon-gamma production               | 95   | 2       | 0.074112 | 26.98623      | 0.002408 |
| GO:0032609 | interferon-gamma production                             | 106  | 2       | 0.082693 | 24.18578      | 0.002987 |
| GO:0032596 | protein transport into membrane raft                    | 5    | 1       | 0.003901 | 256.3692      | 0.003895 |

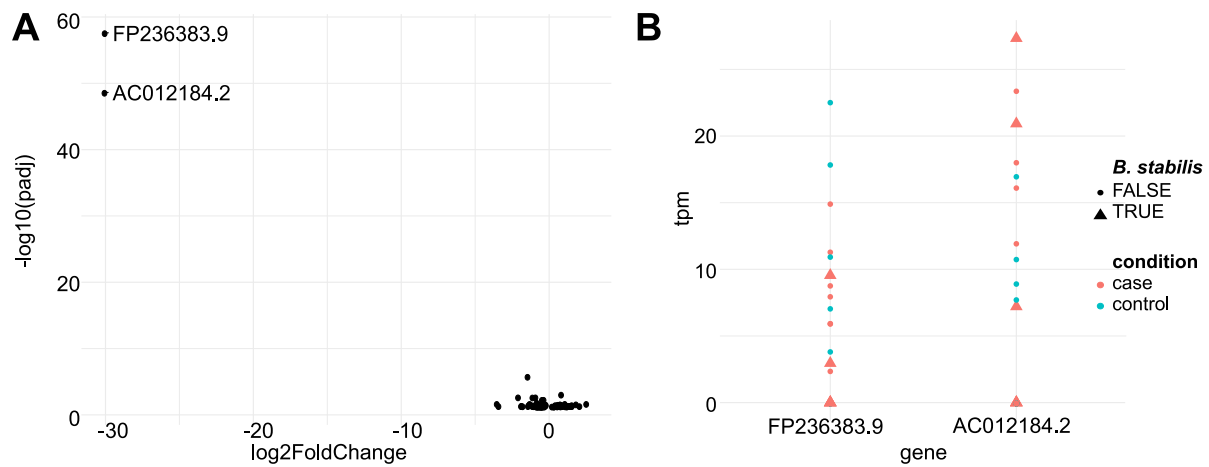

**Figure SF9** Diseased samples with and without *B.stabilis* were analyzed for differential gene expression, for understanding how it might be involved in the disease. **A** 143 genes were discovered as significantly differentially expressed with an adjusted p-value < 0.05 (109 down regulated, 34 up regulated). Two down regulated genes show very high log2 fold change combined with an extremely low p-value. These genes are AC012184.2 and FP236383.9. **B** Their expression values (TPM) are given in the individual samples. AC012184.2 is expressed in choroid plexus in the brain according to the Ensemble expression atlas [6]. According to its GeneCard [7] it produces a novel, uncharacterized protein and is involved in ATP binding. For FP236383.9 much less information can be found. It was manually annotated by the Sanger Institute Havana project [8], is uncharacterized and to be experimentally confirmed (TEC). According to MirTarBase [9] though, the miRNA *hsa-mir-204-5p* is targeting this gene. Using SEA [10], it can be found that this miRNA is associated with retinal degeneration [11] and that the highest expression of this miRNA is found in eye and brain areas. Furthermore, various brain regions show up in the differential expression analysis results with high significance for this miRNA.



## S4 Supplementary Information for Fibrosis study

**Table ST7** All significantly ( $p\text{-adj} < 0.05$ ) differentially expressed pathogens in liver tissue of fibrosis patients vs. control (fibrosis level  $< 1$ )

| tax ID  | species name                                               | log2FC   | p-adj value | smpls |
|---------|------------------------------------------------------------|----------|-------------|-------|
| 1858609 | <i>Acidovorax</i> sp. T1                                   | -29.9827 | 2.93E-13    | 10    |
| 1114967 | <i>Cutibacterium acnes</i> TypelA2 P.acn17                 | -29.6547 | 9.04E-11    | 9     |
| 440085  | <i>Methylobacterium extorquens</i> CM4                     | -29.3346 | 1.31E-10    | 7     |
| 28037   | <i>Streptococcus mitis</i>                                 | -27.8456 | 3.48E-11    | 10    |
| 1211579 | <i>Pseudomonas putida</i> NBRC 14164                       | -27.4035 | 9.04E-11    | 10    |
| 1636603 | <i>Acinetobacter</i> sp. ACNIH1                            | -27.1565 | 3.14E-09    | 7     |
| 122355  | <i>Pseudomonas psychrophila</i>                            | -26.6323 | 5.95E-09    | 6     |
| 43768   | <i>Corynebacterium matruchotii</i>                         | -26.4355 | 2.93E-13    | 13    |
| 47885   | <i>Pseudomonas oryzihabitans</i>                           | -26.3994 | 7.87E-09    | 6     |
| 1879049 | <i>Acinetobacter</i> sp. WCHAc010034                       | -26.2889 | 8.69E-09    | 7     |
| 401472  | <i>Corynebacterium ureicelerivorans</i>                    | -26.0778 | 1.12E-08    | 7     |
| 739141  | <i>Methylobacterium</i> sp. XJLW                           | -25.8098 | 1.56E-08    | 6     |
| 2219696 | <i>Sphingomonas</i> sp. FARSPH                             | -25.4983 | 2.31E-08    | 6     |
| 1325095 | <i>Bradyrhizobium guangzhouense</i>                        | -25.4678 | 2.31E-08    | 7     |
| 436515  | <i>Variovorax boronicumulans</i>                           | -25.2041 | 3.21E-08    | 8     |
| 2480908 | [ <i>Mycobac.</i> ] <i>chelonae</i> subsp. <i>gwanakae</i> | -25.0827 | 3.64E-08    | 8     |
| 47770   | <i>Lactobacillus crispatus</i>                             | -24.8951 | 4.54E-08    | 7     |
| 120107  | <i>Sphingobium cloacae</i>                                 | -24.816  | 4.86E-08    | 6     |
| 1499308 | <i>Paracoccus mutanoliticus</i>                            | -24.6895 | 9.04E-11    | 11    |
| 2014534 | <i>Microbacterium</i> sp. PM5                              | -24.6228 | 6.66E-11    | 11    |
| 71999   | <i>Kocuria palustris</i>                                   | -24.4215 | 9.79E-12    | 12    |
| 2082188 | <i>Sphingobium</i> sp. YG1                                 | -24.2455 | 1.03E-07    | 7     |
| 1196325 | <i>Pseudomonas putida</i> DOT-T1E                          | -24.1474 | 1.13E-07    | 4     |
| 2282475 | <i>Achromobacter</i> sp. B7                                | -24.0824 | 3.23E-09    | 9     |
| 162426  | <i>Microbacterium hominis</i>                              | -23.8223 | 1.70E-07    | 7     |
| 33010   | <i>Cutibacterium avidum</i>                                | -23.6556 | 2.05E-07    | 6     |
| 945844  | <i>Massilia oculi</i>                                      | -23.6202 | 2.07E-07    | 6     |
| 515619  | [ <i>Eubacterium</i> ] <i>rectale</i> ATCC 33656           | -23.5969 | 5.00E-10    | 10    |
| 2079596 | <i>Acinetobacter</i> sp. SWBY1                             | -23.3826 | 2.75E-07    | 5     |
| 29466   | <i>Veillonella parvula</i>                                 | -23.055  | 4.10E-07    | 8     |
| 216778  | <i>Stenotrophomonas rhizophila</i>                         | -23.0221 | 4.15E-07    | 5     |
| 237610  | <i>Pseudomonas psychrotolerans</i>                         | -22.8647 | 4.94E-07    | 4     |
| 33033   | <i>Parvimonas micra</i>                                    | -22.5676 | 7.04E-07    | 7     |
| 1945662 | <i>Paracoccus contaminans</i>                              | -22.4732 | 7.72E-07    | 4     |
| 1123269 | <i>Sphingomonas sanxanigenens</i> ...                      | -22.2548 | 9.91E-07    | 5     |
| 314722  | <i>Pseudoxanthomonas suwonensis</i>                        | -21.7936 | 1.72E-06    | 5     |
| 28131   | <i>Prevotella intermedia</i>                               | -21.676  | 1.92E-06    | 6     |
| 1177574 | <i>Prevotella jejuni</i>                                   | -21.6626 | 1.92E-06    | 3     |
| 178339  | <i>Actinomyces hongkongensis</i>                           | -21.468  | 2.38E-06    | 3     |
| 1930557 | <i>Shewanella</i> sp. FDAARGOS_354                         | -21.1338 | 3.48E-06    | 6     |
| 1804984 | <i>Burkholderia</i> sp. OLG172                             | 28.86658 | 1.31E-10    | 2     |

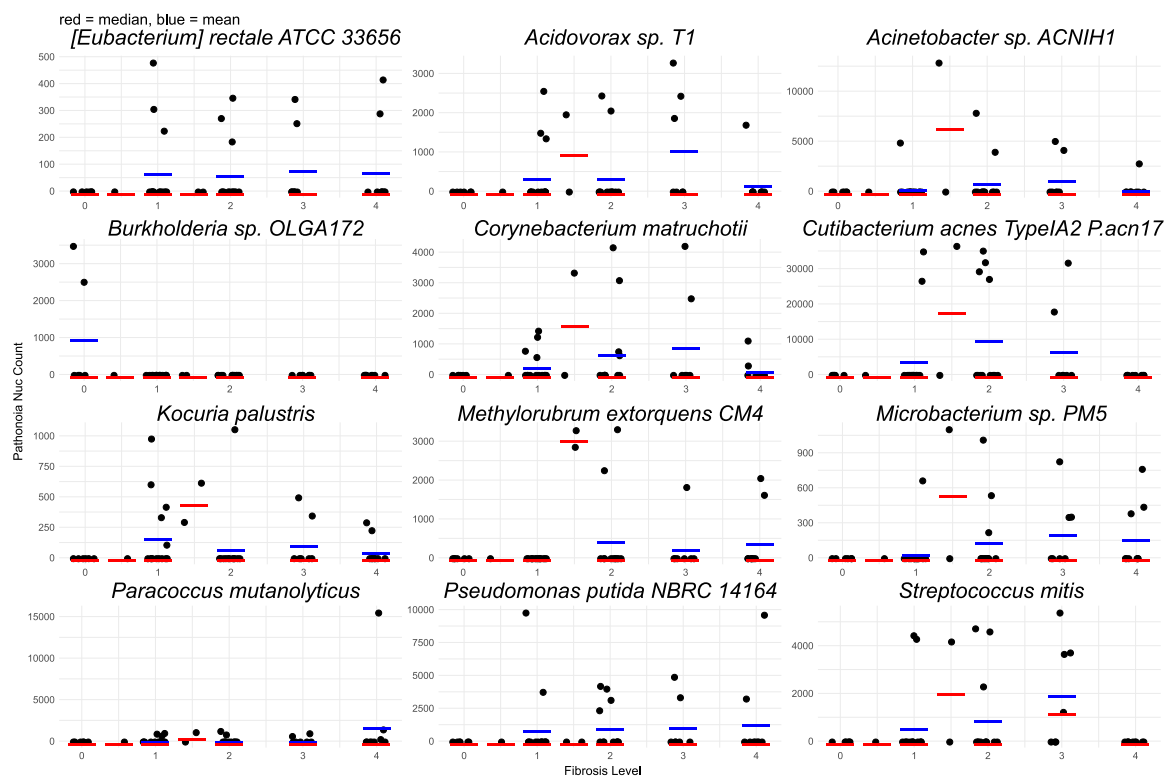

**Figure SF10** Top 12 differentially expressed organisms. The Pathoia abundance for the nine most significant differentially expressed organisms between fibrosis and no fibrosis samples is shown. Values are given for all fibrosis levels separately. Mostly the median (red bar) abundance per sample is zero since presence of specific organisms is rare. Even though the analysis was done comparing fibrosis vs no-fibrosis samples, this plot shows all fibrosis levels. Only *Burkholderia sp. OLGA172* shows abundance in non-fibrotic samples, but only two samples contain this pathogen.

## References

- Wood, D.E., Lu, J., Langmead, B.: Improved metagenomic analysis with kraken 2. *Genome biology* **20**(1), 1–13 (2019)
- Danecek, P., Bonfield, J.K., Liddle, J., Marshall, J., Ohan, V., Pollard, M.O., Whitwham, A., Keane, T., McCarthy, S.A., Davies, R.M., Li, H.: Twelve years of SAMtools and BCFtools. *GigaScience* **10**(2) (2021)
- Dobin, A., Davis, C.A., Schlesinger, F., Drenkow, J., Zaleski, C., Jha, S., Batut, P., Chaisson, M., Gingeras, T.R.: STAR: ultrafast universal RNA-seq aligner. *Bioinformatics* **29**(1), 15–21 (2012)
- Liebhoff, A.-M.: Detection of Pathogenic Infections in Neurological Disorders Through Recycling of Gene Expression Data. Cuvillier Verlag, Göttingen (2021)
- Ye, S.H., Siddle, K.J., Park, D.J., Sabeti, P.C.: Benchmarking metagenomics tools for taxonomic classification. *Cell* **178**(4), 779–794 (2019)
- Papatheodorou, I., Moreno, P., Manning, J., Fuentes, A.M.-P., George, N., Fexova, S., Fonseca, N.A., Füllgrabe, A., Green, M., Huang, N., et al.: Expression atlas update: from tissues to single cells. *Nucleic acids research* **48**(D1), 77–83 (2020)
- Stelzer, G., Rosen, N., Plaschkes, I., Zimmerman, S., Twik, M., Fishilevich, S., Stein, T.I., Nudel, R., Lieder, I., Mazor, Y., et al.: The genecards suite: from gene data mining to disease genome sequence analyses. *Current protocols in bioinformatics* **54**(1), 1–30 (2016)
- Sanger Institute: Manual Annotation - Havana. (2020). <https://www.sanger.ac.uk/project/manual-annotation> (accessed August 5, 2020)
- Hsu, S.-D., Lin, F.-M., Wu, W.-Y., Liang, C., Huang, W.-C., Chan, W.-L., Tsai, W.-T., Chen, G.-Z., Lee, C.-J., Chiu, C.-M., et al.: mirtarbase: a database curates experimentally validated microRNA–target interactions. *Nucleic acids research* **39**(suppl.1), 163–169 (2011)
- Rahman, R.-U., Liebhoff, A.-M., Bansal, V., Fiosins, M., Rajput, A., Sattar, A., Magruder, D.S., Madan, S., Sun, T., Gautam, A., et al.: Seaweb: the small rna expression atlas web application. *Nucleic acids research* **48**(D1), 204–219 (2020)
- Arora, A., Guduric-Fuchs, J., Harwood, L., Dellett, M., Cogliati, T., Simpson, D.A.: Prediction of microRNAs affecting mRNA expression during retinal development. *BMC developmental biology* **10**(1), 1–15 (2010)
